# Supplementary material
Source: PubMed Central journal article supplement (PMC4185900)
Supplement: hvi-10-399-s01.pdf [file hvi-10-399-s01.pdf]

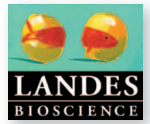

## Supplemental Material to:

Annette M Dougall, Mariusz Skwarczynski, Makan Khoshnejad, Saranya Chandrudu, Norelle L Daly, Istvan Toth, and Alex Loukas

Lipid core peptide targeting the cathepsin D hemoglobinase of *Schistosoma mansoni* as a component of a schistosomiasis vaccine

Human Vaccines & Immunotherapeutics 2014; 10(2)

<http://dx.doi.org/10.4161/hv.27057>

<https://www.landesbioscience.com/journals/vaccines/article/27057/>

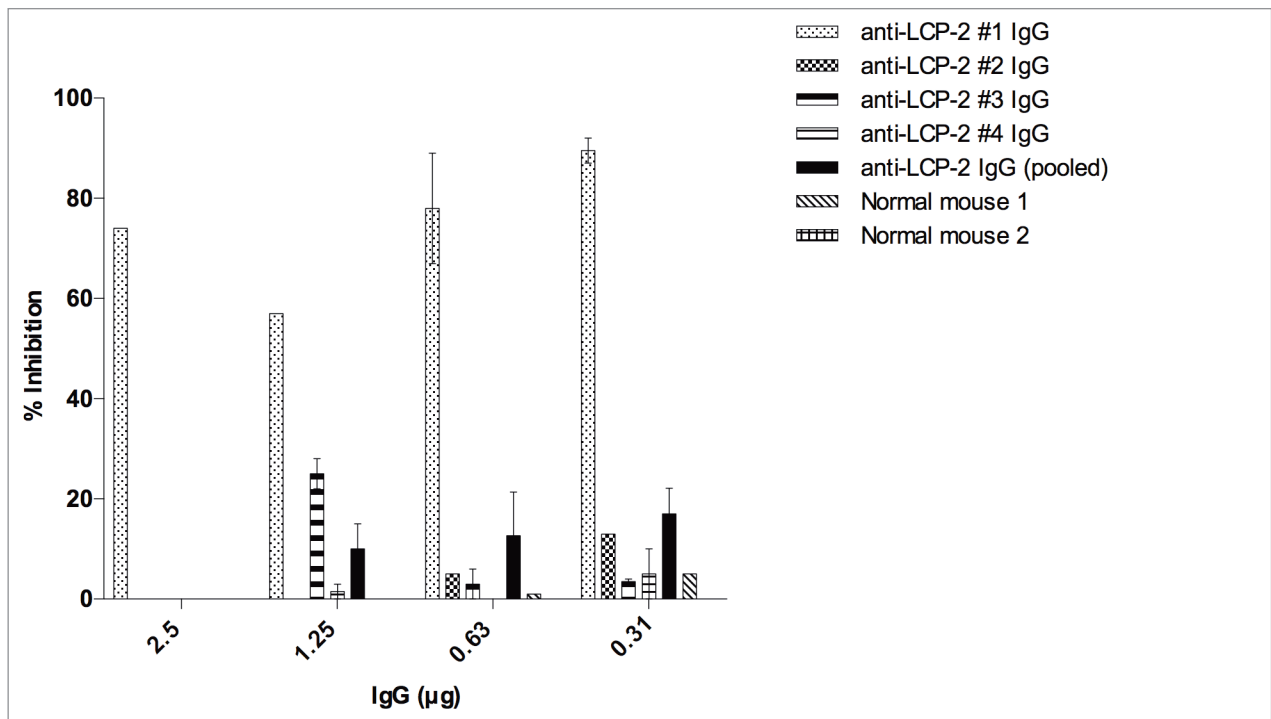

**Figure S1.** Antibody neutralization of native cathepsin D substrate cleavage within soluble worm adult protein extract (IgG range 0.31– 2.5 µg).
